# Supplementary material for: Early Cretaceous Volcanic Edifice Activity in the Sulu Orogenic Belt: Evidences From Volcanic-Sedimentary Rhythm Characteristics in Lingshan Island, Eastern Shandong Province, China
Source: Frontiers journal article supplement (doi:10.3389/feart.2022.908193), 2022-07-08
Supplement: Table_1.XLSX [file Table_1.XLSX]

## Sheet: Sheet1
TOP	BOTTOM	LITHOLOGY	THICKNESS(MM)		TOP	BOTTOM	LITHOLOGY	THICKNESS(MM)
0	0.3	MUD	0.3		0.3	4.7	TUFF	4.4
4.7	5.9	MUD	1.2		5.9	9.4	TUFF	3.5
9.4	9.7	MUD	0.3		9.7	16.2	TUFF	6.5
16.2	17.3	MUD	1.1		17.3	25.1	TUFF	7.8
25.1	25.3	MUD	0.2		25.3	29.7	TUFF	4.4
29.7	29.8	MUD	0.1		29.8	31.4	TUFF	1.6
31.4	31.5	MUD	0.1		31.5	33.9	TUFF	2.4
33.9	35.2	MUD	1.3		35.2	43.1	TUFF	7.9
43.1	43.3	MUD	0.2		43.3	48.9	TUFF	5.6
48.9	50.2	MUD	1.3		50.2	55.1	TUFF	4.9
55.1	55.2	MUD	0.1		55.2	59.7	TUFF	4.5
59.7	61.2	MUD	1.5		61.2	70.3	TUFF	9.1
70.3	70.4	MUD	0.1		70.4	74.7	TUFF	4.3
74.7	75.2	MUD	0.5		75.2	76.1	TUFF	0.9
76.1	76.2	MUD	0.1		76.2	82.1	TUFF	5.9
82.1	82.3	MUD	0.2		82.3	85.2	TUFF	2.9
85.2	85.3	MUD	0.1		85.3	88.4	TUFF	3.1
88.4	89.7	MUD	1.3		89.7	94.3	TUFF	4.6
94.3	96	MUD	1.7		96	107.9	TUFF	11.9
107.9	109.3	MUD	1.4		109.3	114.2	TUFF	4.9
114.2	114.3	MUD	0.1		114.3	123.5	TUFF	9.2
123.5	123.6	MUD	0.1		123.6	131.2	TUFF	7.6
131.2	131.3	MUD	0.1		131.3	139.9	TUFF	8.6
139.9	140	MUD	0.1		140	144.1	TUFF	4.1
144.1	144.9	MUD	0.8		144.9	151.8	TUFF	6.9
151.8	152	MUD	0.2		152	156.3	TUFF	4.3
156.3	156.5	MUD	0.2		156.5	162.4	TUFF	5.9
162.4	162.6	MUD	0.2		162.6	166.7	TUFF	4.1
166.7	166.8	MUD	0.1		166.8	168.5	TUFF	1.7
168.5	168.6	MUD	0.1		168.6	170.1	TUFF	1.5
170.1	170.3	MUD	0.2		170.3	171.8	TUFF	1.5
171.8	171.9	MUD	0.1		171.9	175.6	TUFF	3.7
175.6	175.8	MUD	0.2		175.8	179.9	TUFF	4.1
179.9	180	MUD	0.1		180	183.6	TUFF	3.6
183.6	183.7	MUD	0.1		183.7	185.4	TUFF	1.7
185.4	185.6	MUD	0.2		185.6	188.9	TUFF	3.3
188.9	189.1	MUD	0.2		189.1	193	TUFF	3.9
193	193.3	MUD	0.3		193.3	199.2	TUFF	5.9
199.2	199.3	MUD	0.1		199.3	201.4	TUFF	2.1
201.4	201.5	MUD	0.1		201.5	207.6	TUFF	6.1
207.6	210	MUD	2.4		210	213.9	TUFF	3.9
213.9	214	MUD	0.1		214	219.7	TUFF	5.7
219.7	219.8	MUD	0.1		219.8	223.9	TUFF	4.1
223.9	224.1	MUD	0.2		224.1	227.2	TUFF	3.1
227.2	227.4	MUD	0.2		227.4	230.5	TUFF	3.1
230.5	230.6	MUD	0.1		230.6	236.1	TUFF	5.5
236.1	236.4	MUD	0.3		236.4	239.5	TUFF	3.1
239.5	240.7	MUD	1.2		240.7	246.8	TUFF	6.1
246.8	246.9	MUD	0.1		246.9	249.3	TUFF	2.4
249.3	249.4	MUD	0.1		249.4	250.8	TUFF	1.4
250.8	250.9	MUD	0.1		250.9	259	TUFF	8.1
259	260	MUD	1		260	262.6	TUFF	2.6
262.6	262.8	MUD	0.2		262.8	270.3	TUFF	7.5
270.3	270.4	MUD	0.1		270.4	274.2	TUFF	3.8
274.2	274.3	MUD	0.1		274.3	277	TUFF	2.7
277	277.1	MUD	0.1		277.1	282	TUFF	4.9
282	282.2	MUD	0.2		282.2	292	TUFF	9.8
292	292.5	MUD	0.5		292.5	296.7	TUFF	4.2
296.7	296.8	MUD	0.1		296.8	301.6	TUFF	4.8
301.6	301.7	MUD	0.1		301.7	303.1	TUFF	1.4
303.1	308.7	MUD	5.6		308.7	314.8	TUFF	6.1
314.8	314.9	MUD	0.1		314.9	319.1	TUFF	4.2
319.1	319.2	MUD	0.1		319.2	321.8	TUFF	2.6
321.8	322	MUD	0.2		322	325.4	TUFF	3.4
325.4	325.5	MUD	0.1		325.5	330.1	TUFF	4.6
330.1	330.3	MUD	0.2		330.3	342.3	TUFF	12
342.3	342.5	MUD	0.2		342.5	346.5	TUFF	4
346.5	348	MUD	1.5		348	353.5	TUFF	5.5
353.5	353.6	MUD	0.1		353.6	360.7	TUFF	7.1
360.7	360.8	MUD	0.1		360.8	367.3	TUFF	6.5
367.3	367.4	MUD	0.1		367.4	374.8	TUFF	7.4
374.8	375	MUD	0.2		375	377.4	TUFF	2.4
377.4	377.5	MUD	0.1		377.5	384.9	TUFF	7.4
384.9	385.1	MUD	0.2		385.1	387.5	TUFF	2.4
387.5	387.6	MUD	0.1		387.6	388.7	TUFF	1.1
388.7	388.8	MUD	0.1		388.8	394.2	TUFF	5.4
394.2	397.1	MUD	2.9		397.1	398.7	TUFF	1.6
398.7	400.6	MUD	1.9		400.6	405.1	TUFF	4.5
405.1	408.2	MUD	3.1		408.2	417.1	TUFF	8.9
417.1	417.2	MUD	0.1		417.2	418.7	TUFF	1.5
418.7	418.8	MUD	0.1		418.8	422.9	TUFF	4.1
422.9	423	MUD	0.1		423	425.5	TUFF	2.5
425.5	425.7	MUD	0.2		425.7	427.7	TUFF	2
427.7	427.9	MUD	0.2		427.9	429.4	TUFF	1.5
429.4	429.6	MUD	0.2		429.6	440.6	TUFF	11
440.6	440.7	MUD	0.1		440.7	440.8	TUFF	0.1
440.8	440.9	MUD	0.1		440.9	442.4	TUFF	1.5
442.4	442.5	MUD	0.1		442.5	459.5	TUFF	17
459.5	460.5	MUD	1		460.5	464	TUFF	3.5
464	464.5	MUD	0.5		464.5	466	TUFF	1.5

## Sheet: Sheet2
TOP	0	4.7	9.4	16.2	25.1	29.7	31.4	33.9	43.1	48.9	55.1	59.7	70.3	74.7	76.1	82.1	85.2	88.4	94.3	107.9	114.2	123.5	131.2	139.9	144.1	151.8	156.3	162.4	166.7	168.5	170.1	171.8	175.6	179.9	183.6	185.4	188.9	193	199.2	201.4	207.6	213.9	219.7	223.9	227.2	230.5	236.1	239.5	246.8
BOTTOM	0.3	5.9	9.7	17.3	25.3	29.8	31.5	35.2	43.3	50.2	55.2	61.2	70.4	75.2	76.2	82.3	85.3	89.7	96	109.3	114.3	123.6	131.3	140	144.9	152	156.5	162.6	166.8	168.6	170.3	171.9	175.8	180	183.7	185.6	189.1	193.3	199.3	201.5	210	214	219.8	224.1	227.4	230.6	236.4	240.7	246.9
LITHOLOGY	MUD	MUD	MUD	MUD	MUD	MUD	MUD	MUD	MUD	MUD	MUD	MUD	MUD	MUD	MUD	MUD	MUD	MUD	MUD	MUD	MUD	MUD	MUD	MUD	MUD	MUD	MUD	MUD	MUD	MUD	MUD	MUD	MUD	MUD	MUD	MUD	MUD	MUD	MUD	MUD	MUD	MUD	MUD	MUD	MUD	MUD	MUD	MUD	MUD
THICKNESS(MM)	0.3	1.2	0.3	1.1	0.2	0.1	0.1	1.3	0.2	1.3	0.1	1.5	0.1	0.5	0.1	0.2	0.1	1.3	1.7	1.4	0.1	0.1	0.1	0.1	0.8	0.2	0.2	0.2	0.1	0.1	0.2	0.1	0.2	0.1	0.1	0.2	0.2	0.3	0.1	0.1	2.4	0.1	0.1	0.2	0.2	0.1	0.3	1.2	0.1
TOP	0.3	5.9	9.7	17.3	25.3	29.8	31.5	35.2	43.3	50.2	55.2	61.2	70.4	75.2	76.2	82.3	85.3	89.7	96	109.3	114.3	123.6	131.3	140	144.9	152	156.5	162.6	166.8	168.6	170.3	171.9	175.8	180	183.7	185.6	189.1	193.3	199.3	201.5	210	214	219.8	224.1	227.4	230.6	236.4	240.7	246.9
BOTTOM	4.7	9.4	16.2	25.1	29.7	31.4	33.9	43.1	48.9	55.1	59.7	70.3	74.7	76.1	82.1	85.2	88.4	94.3	107.9	114.2	123.5	131.2	139.9	144.1	151.8	156.3	162.4	166.7	168.5	170.1	171.8	175.6	179.9	183.6	185.4	188.9	193	199.2	201.4	207.6	213.9	219.7	223.9	227.2	230.5	236.1	239.5	246.8	249.3
LITHOLOGY	TUFF	TUFF	TUFF	TUFF	TUFF	TUFF	TUFF	TUFF	TUFF	TUFF	TUFF	TUFF	TUFF	TUFF	TUFF	TUFF	TUFF	TUFF	TUFF	TUFF	TUFF	TUFF	TUFF	TUFF	TUFF	TUFF	TUFF	TUFF	TUFF	TUFF	TUFF	TUFF	TUFF	TUFF	TUFF	TUFF	TUFF	TUFF	TUFF	TUFF	TUFF	TUFF	TUFF	TUFF	TUFF	TUFF	TUFF	TUFF	TUFF
THICKNESS(MM)	4.4	3.5	6.5	7.8	4.4	1.6	2.4	7.9	5.6	4.9	4.5	9.1	4.3	0.9	5.9	2.9	3.1	4.6	11.9	4.9	9.2	7.6	8.6	4.1	6.9	4.3	5.9	4.1	1.7	1.5	1.5	3.7	4.1	3.6	1.7	3.3	3.9	5.9	2.1	6.1	3.9	5.7	4.1	3.1	3.1	5.5	3.1	6.1	2.4
[truncated: 41 more columns]
